# Supplementary material
Source: publisher figshare collection journal article supplement (https://tandf.figshare.com/ndownloader/files/15084467)
Supplement: Supplementary file 1 [file 15084467]

**Fusaric acid induced promoter methylation of DNA methyltransferases triggers DNA hypomethylation in human hepatocellular carcinoma (HepG2) cells**

Terisha Ghazia, Savania Nagiaha, Pragalathan Naidooa, and Anil A. Chuturgoona,*

aDiscipline of Medical Biochemistry and Chemical Pathology, School of Laboratory Medicine and Medical Science, College of Health Sciences, Howard College Campus, University of Kwa-Zulu Natal, Durban 4041, South Africa

*Corresponding author: Professor Anil A. Chuturgoon, Discipline of Medical Biochemistry and Chemical Pathology, School of Laboratory Medicine and Medical Science, College of Health Sciences, Howard College Campus, University of Kwa-Zulu Natal, Durban 4041, South Africa. Telephone: +27 31 260 4404; Fax: +27 31 260 4785; Email: [CHUTUR@ukzn.ac.za](mailto:CHUTUR@ukzn.ac.za)

**Author Email Addresses:**

Terisha Ghazi: [terishaghazi@gmail.com](mailto:terishaghazi@gmail.com)

Savania Nagiah: [nagiah.savania@gmail.com](mailto:nagiah.savania@gmail.com)

Pragalathan Naidoo: [pragalathan.naidoo@gmail.com](mailto:pragalathan.naidoo@gmail.com)

Anil A. Chuturgoon: [CHUTUR@ukzn.ac.za](mailto:CHUTUR@ukzn.ac.za)

**ORCID**

Terisha Ghazi: <https://orcid.org/0000-0002-0179-213X>

Savania Nagiah: https://orcid.org/0000-0002-7614-8226

Pragalathan Naidoo: <https://orcid.org/0000-0002-8905-5926>

Anil A. Chuturgoon: https://orcid.org/0000-0003-4649-4133

**Supplementary Information**

**Quantification of DNA methylation formula:**

5-Methylcytosine (ng) =

5-Methylcytosine (%) =

**Quantification of promoter methylation formula:**

Methylation (%) = 100 X 2-ΔCt, where ΔCt = Ct (test) – Ct (reference)

**Supplementary Table S1: The effect of FA on the mRNA expression of *MBD1*, *MBD2*, *MBD3*, *MBD4*, *MBD5* and *MBD6* in HepG2 cells**

| **Gene** | **Concentration of Fusaric Acid (µg/ml)** | | | | | ***p* value** |
| --- | --- | --- | --- | --- | --- | --- |
| **0** | **25** | **50** | **104** | **150** |
| ***MBD1*** | 1.02±0.01 | 0.38±0.03*** | 0.42±0.08*** | 0.18±0.03*** | 0.48±0.03*** | <0.0001 |
| ***MBD2*** | 1.02±0.01 | 0.17±0.01*** | 0.64±0.08*** | 0.14±0.01*** | 0.09±0.01*** | <0.0001 |
| ***MBD3*** | 1.02±0.01 | 0.40±0.05*** | 0.31±0.02*** | 0.34±0.08*** | 0.34±0.03*** | <0.0001 |
| ***MBD4*** | 1.02±0.01 | 0.14±0.01*** | 0.67±0.09*** | 0.20±0.04*** | 0.22±0.04*** | <0.0001 |
| ***MBD5*** | 1.02±0.01 | 0.16±0.11*** | 0.31±0.13*** | 0.28±0.04*** | 0.13±0.07*** | <0.0001 |
| ***MBD6*** | 1.02±0.01 | 0.18±0.01*** | 0.15±0.02*** | 0.18±0.03*** | 0.72±0.06*** | <0.0001 |

RNA isolated from control and FA treated HepG2 cells were reverse transcribed into cDNA and analysed for *MBD1*-*MBD6* expression by qPCR. Results are represented as mean relative fold-change ± SD (n=3). **Key:** ****p* < 0.0001, denotes statistical significance, one-way ANOVA with the Bonferroni multiple comparisons test.

**Supplementary Table S2: qPCR primer sequences and annealing temperatures**

| **Gene** | **GenBank Accession no.** | **Sense Primer (5’→3’)** | **Anti-Sense Primer (5’→3’)** | **Annealing Temperature (°C)** |
| --- | --- | --- | --- | --- |
| ***Promoter Methylation*** | | | | |
| ***DNMT1*** | NM_001130823 | ACCGCTTCTACTTCCTCGAGGCCTA | GTTGCAGTCCTCTGTGAACACTGTGG | 60 |
| ***DNMT3A*** | NM_175629 | GGGGACGTCCGCAGCGTCACAC | CAGGGTTGGACTCGAGAAATCGC | 58 |
| ***DNMT3B*** | NM_006892 | CCTGCTGAATTACTCACGCCCC | GTCTGTGTAGTGCACAGGAAAGCC | 58 |
| ***MBD2*** | NM_003927 | AGGTAGCAATGATGAGACCCTTTTA | TAAGCCAAACAGCAGGGTTCTT | 60 |
| ***miR-29b*** | **-** | TCCGTATGCTGGTTACTCAC | ATTCTGATAAAACCACCAACT | 54 |
| ***Gene Expression*** | | | | |
| ***DNMT1*** | NM_001130823 | ACCGCTTCTACTTCCTCGAGGCCTA | GTTGCAGTCCTCTGTGAACACTGTGG | 60 |
| ***DNMT3A*** | NM_175629 | GGGGACGTCCGCAGCGTCACAC | CAGGGTTGGACTCGAGAAATCGC | 58 |
| ***DNMT3B*** | NM_006892 | CCTGCTGAATTACTCACGCCCC | GTCTGTGTAGTGCACAGGAAAGCC | 58 |
| ***Sp1*** | NM_138473 | CTTGGTATCATCACAAGCCAGTT | TCCCTGATGATCCACTGGTAGTA | 56 |
| ***UHRF1*** | NM_001048201 | GCCATACCCTCTTCGACTACG | GCCCCAATTCCGTCTCATCC | 58 |
| ***USP7*** | NM_003470 | GGAAGCGGGAGATACAGATGA | AAGGACCGACTCACTCAGTCT | 58 |
| ***MBD1*** | NM_015846 | AAGTCTTTCGCAAGTCAGGGG | TCAGCTCAACTTTGCTTCGGA | 58 |
| ***MBD2*** | NM_003927 | AGGTAGCAATGATGAGACCCTTTTA | TAAGCCAAACAGCAGGGTTCTT | 60 |
| ***MBD3*** | NM_001281453 | CAGCCGGTGACCAAGATTACC | CTCCTCAGCAATGTCGAAGG | 58 |
| ***MBD4*** | NM_003925 | TCTAGTGAGCGCCTAGTCCCAG | TTCCAATTCCATAGCAACATCTTCT | 60 |
| ***MBD5*** | NM_018328 | GGTCTTCCAGCTATACAAGTTCC | ACCTGCTCCAAGCAAGATAAC | 56 |
| ***MBD6*** | NM_052897 | GGAGTGTCCACTTAATGTCCCC | GTTGCACAGCTTGGTCATGTC | 58 |

**Supplementary Figure S1:** **CpG islands within the *DNMT1*, *DNMT3A*, *DNMT3B* and *MBD2* promoter regions obtained using the MethPrimer software version 2.0. [1].**

**Reference**

[1] Li LC, Dahiya R. MethPrimer: designing primers for methylation PCRs. Bioinformatics. 2002 Nov;18:1427-1431. PubMed PMID: 12424112.
